# Supplementary material
Source: PubMed Central journal article supplement (PMC2752014)
Supplement: jlb.0408240_2.pdf [file jlb.0408240_2.pdf]

**Supplemental Table I. Gene Expression for Matrix Metalloproteinases in Alveolar Macrophages as Related to Plasma Viral Load<sup>1</sup>**

| HIV-1 viral load | MMP-1 | MMP-2 | MMP-9 | MMP-10 | MMP-7 | MMP-12 | MMP-14 |
|------------------|-------|-------|-------|--------|-------|--------|--------|
| <50              | 5.27  | 1.76  | 1.83  | 2.54   | 4.38  | 7.02   | 4.74   |
| <50              | 3.07  | 2.48  | 0.73  | 3.96   | 1.24  | 8.81   | 1.87   |
| <50              | 5.73  | 2.68  | 3.18  | 1.05   | 6.05  | 1.79   | 1.94   |
| <50              | 16.70 | 5.29  | 1.61  | 5.31   | 5.33  | 4.78   | 4.09   |
| <50              | 1.30  | 1.00  | 2.81  | 2.11   | 2.00  | 0.80   | 2.75   |
| 600              | 0.09  | 0.82  | 1.33  | 0.26   | 0.76  | 2.32   | 0.88   |
| 600              | 6.45  | 1.61  | 2.08  | 1.22   | 1.61  | 4.60   | 4.96   |
| 3300             | 0.64  | 2.93  | 0.98  | 0.20   | 2.26  | 1.65   | 1.68   |
| 23000            | 0.41  | 0.92  | 1.00  | 1.53   | 1.13  | 0.10   | 02.07  |
| 55025            | 9.94  | 0.44  | 1.90  | 2.64   | 19.20 | 0.86   | 2.83   |
| 308,000          | 3.42  | 1.23  | 0.63  | 1.00   | 1.42  | 1.61   | 0.64   |

<sup>1</sup>Normalized gene expression (from microarray).
