# Supplementary material
Source: PubMed Central journal article supplement (PMC2752014)

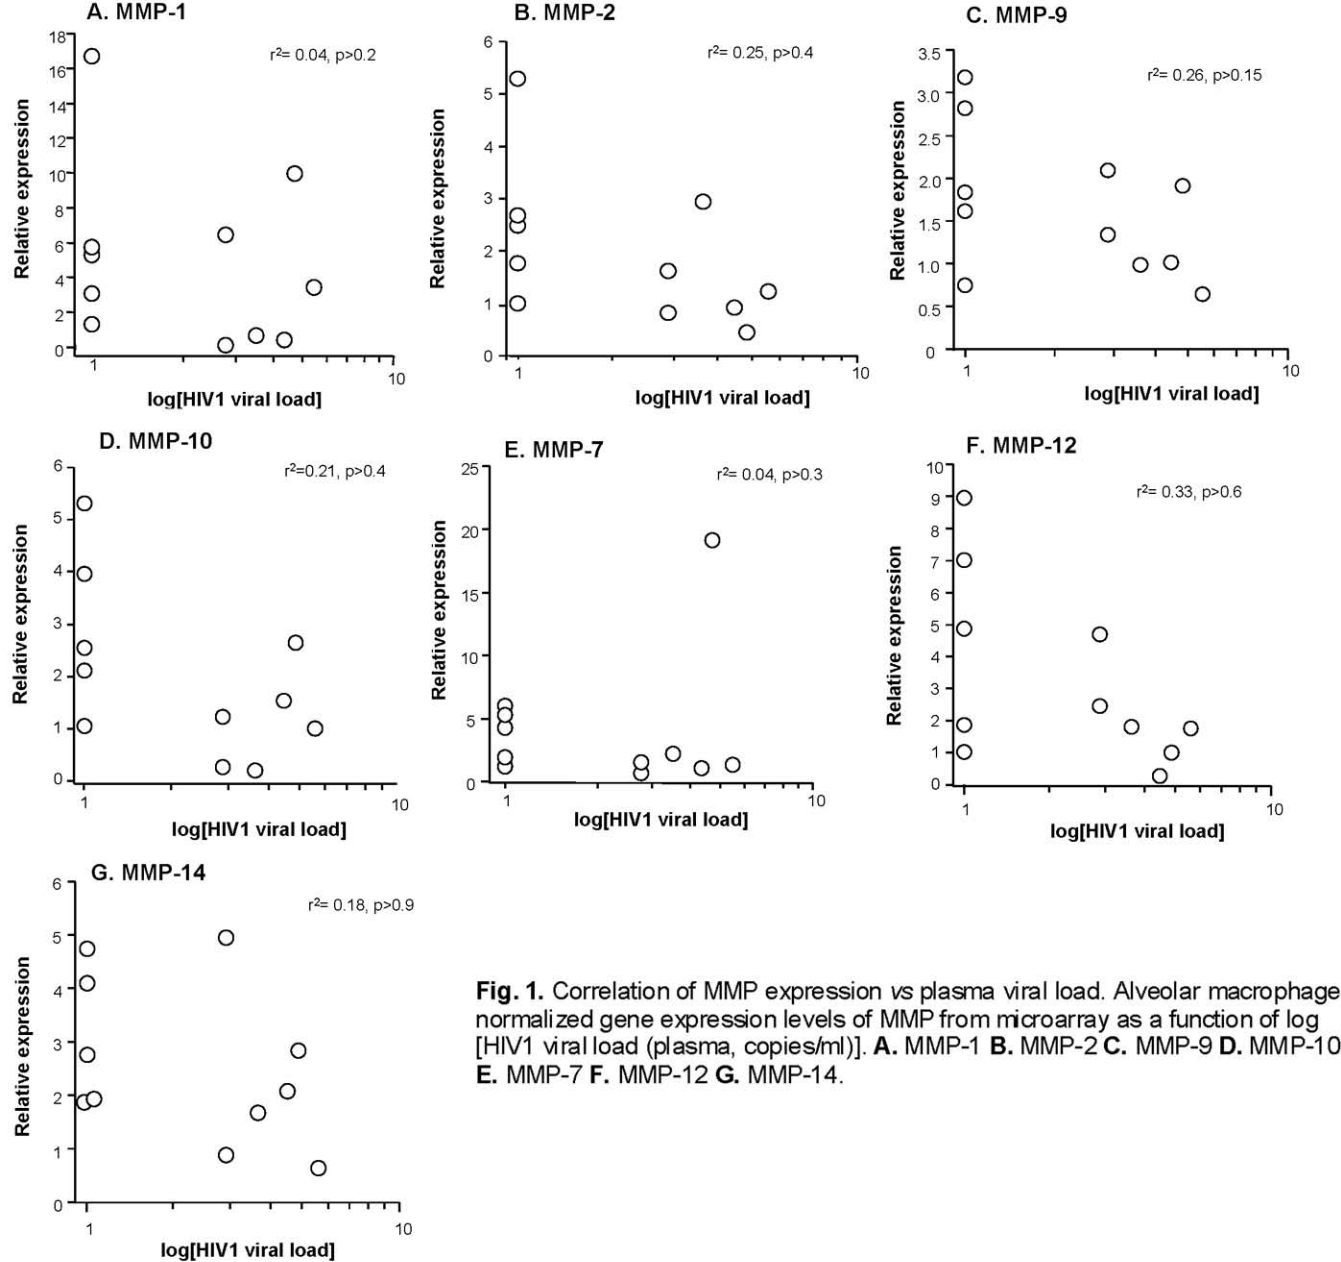

Supplement: jlb.0408240_1.pdf [file jlb.0408240_1.pdf]
